# Supplementary material for: Stabilizing lithium metal anodes with bismuth oxide-coated 3D copper foams via an in situ bifunctional mediation layer
Source: Royal Society of Chemistry journal article supplement (doi:10.1039/d5ta00228a), 2025-01-01
Supplement: d5ta00228a1.pdf [file d5ta00228a1.pdf]

## Supporting Information

### Stabilizing Lithium Metal Anode with Bismuth Oxide-Coated 3D

### Copper Foam via an In-Situ Bifunctional Mediation Layer

Yida Wang <sup>a</sup>, Juntao Si <sup>a</sup>, Yiran Zhu <sup>a</sup>, Kuo Cao <sup>a</sup>, Sihan Zeng <sup>a</sup>, Yunyong Hu <sup>a</sup>, Bikai

Pan <sup>b, c</sup>, Chunhua Chen <sup>a \*</sup>

<sup>a</sup> Chinese Academy of Sciences Key Laboratory of Precision and Intelligent

Chemistry, Department of Materials Science and Engineering, University of Science

and Technology of China, Hefei 230026, Anhui, China

<sup>b</sup> Hefei National Laboratory for Physical Sciences at the Micro Scale, University of

Science and Technology of China, Hefei, Anhui 230026, China

<sup>c</sup> Key Laboratory of Strongly Coupled Quantum Matter Physics, Department of

Physics, University of Science and Technology of China, Hefei, Anhui 230026, China

\* Corresponding author: E-mail address: [cchchen@ustc.edu.cn](mailto:cchchen@ustc.edu.cn)

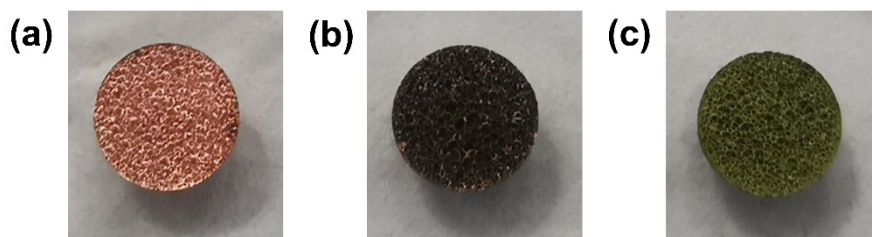

**Fig. S1.** Digital images of (a) Cu foam, (b) Bi@CF and (c) BO@CF.

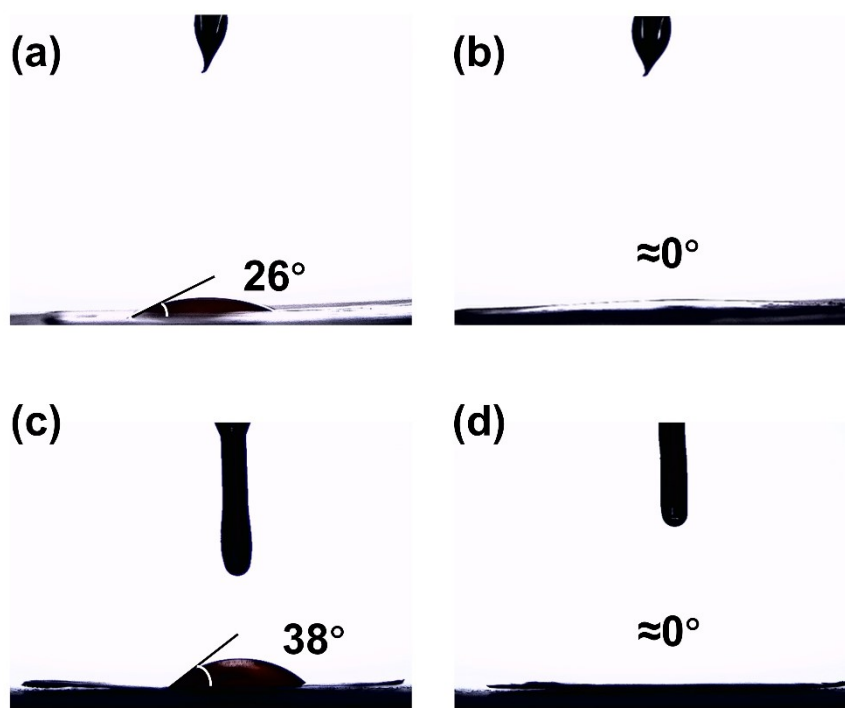

**Fig. S2.** Contact angles of ether electrolyte (1.0 M LiTFSI in 1,3-dioxolane (DOL)/dimethoxyethane (DME), 1:1 v/v, with 2.0% LiNO<sub>3</sub>) on the surface of the (a) Cu foil and (b) BO@Cu foil, and ester electrolyte (1.0 M LiPF<sub>6</sub> in ethylene carbonate (EC)/dimethyl carbonate (DMC), 1:1 v/v) on the surface of the (c) Cu foil and (d) BO@Cu foil.

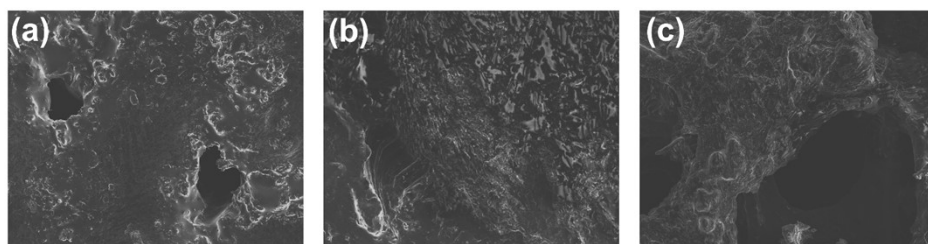

**Fig. S3.** Schematic illustration of Li plating/stripping mechanisms on Bi@CF current collectors. SEM images with different Li plating capacities of (a)  $5 \text{ mAh cm}^{-2}$ , (b)  $10 \text{ mAh cm}^{-2}$ , and (c) followed by stripping  $10 \text{ mAh cm}^{-2}$  to  $50 \text{ mV}$ .

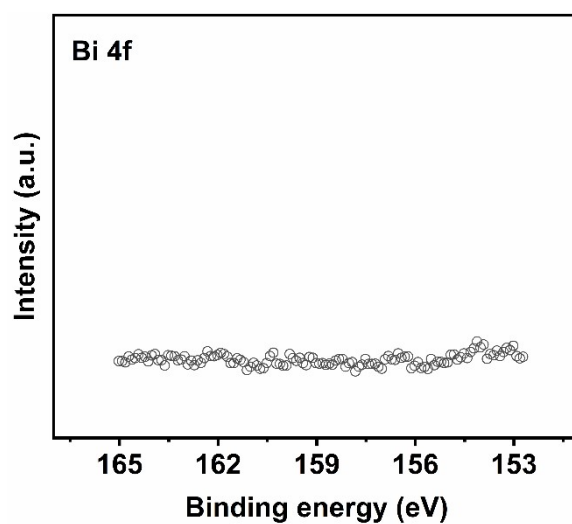

**Fig. S4.** The XPS of Bi 4f on the lithiated BO@CF surface without e-beam etching.

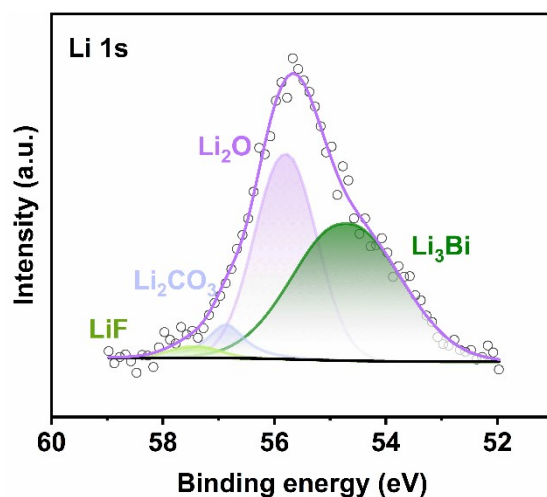

**Fig. S5.** The XPS of Li 1s on the lithiated BO@CF surface with e-beam etching.

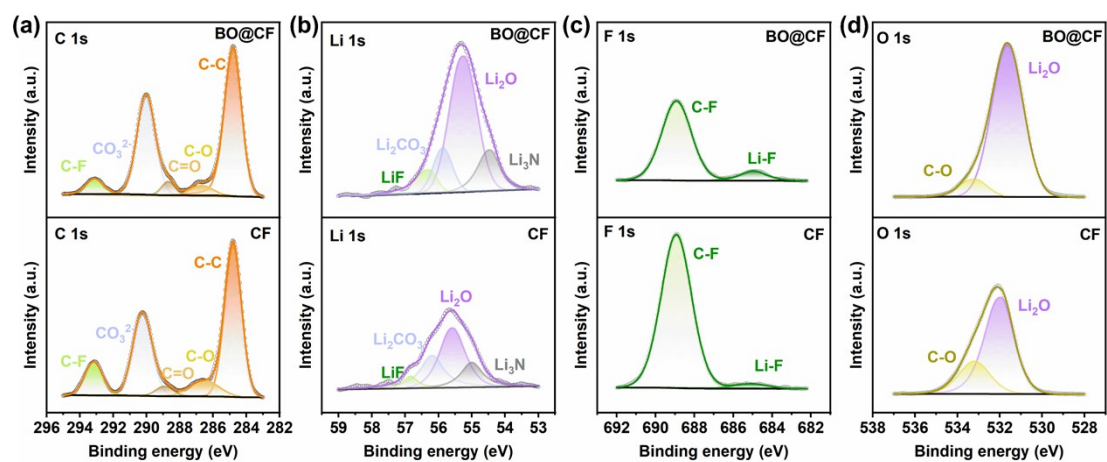

**Fig. S6.** XPS spectra for BO@CF and CF of C 1s (a), Li 1s (b), F 1s (c) and O 1s (d) after 50 cycles.

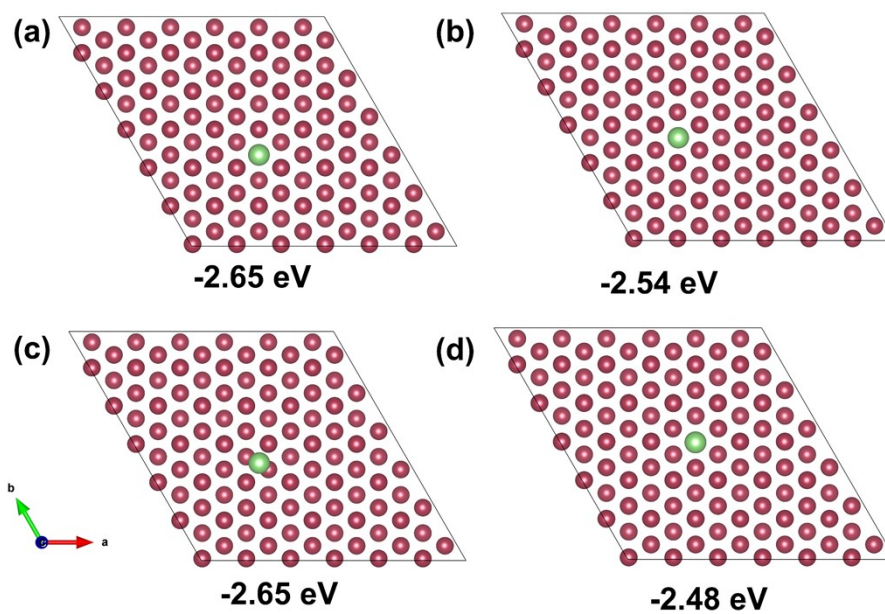

**Fig. S7.** The adsorption sites and the corresponding adsorption energies of Li on the surface of Cu (111).

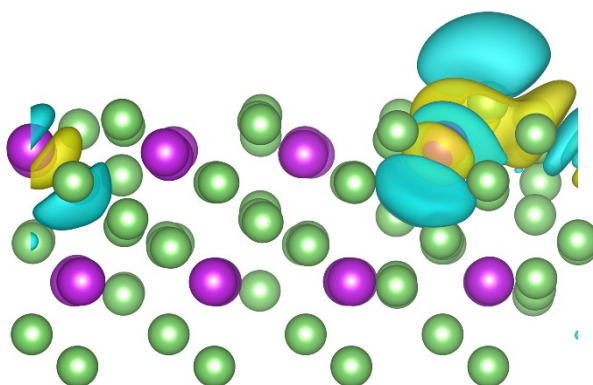

**Fig. S8.** Electron density differences of Li on the  $\text{Li}_3\text{Bi}$  (111) surface.

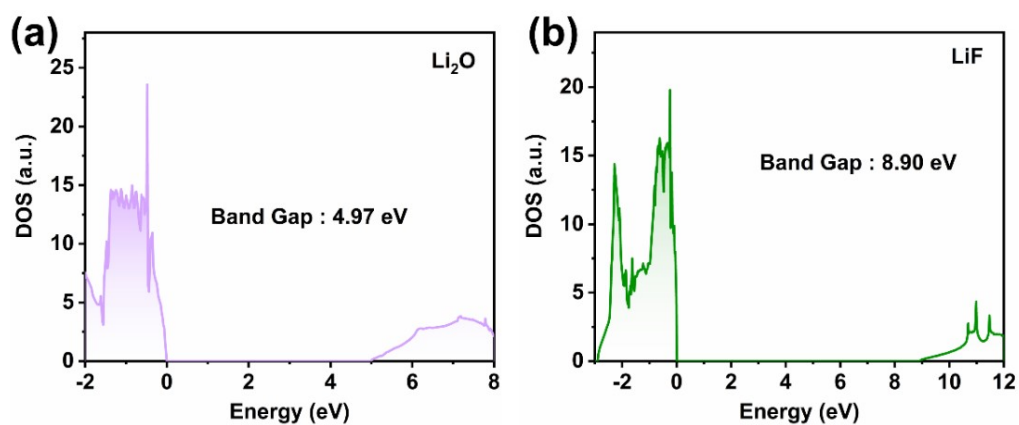

**Fig. S9.** The DOS of (a)  $\text{Li}_2\text{O}$  and (b)  $\text{LiF}$ .

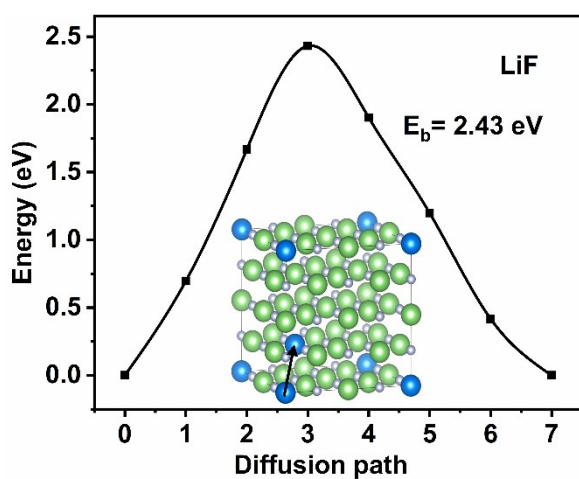

**Fig. S10.** The diffusion energy barrier of Li in bulk  $\text{LiF}$  along the  $[2\bar{1}1]$  direction.

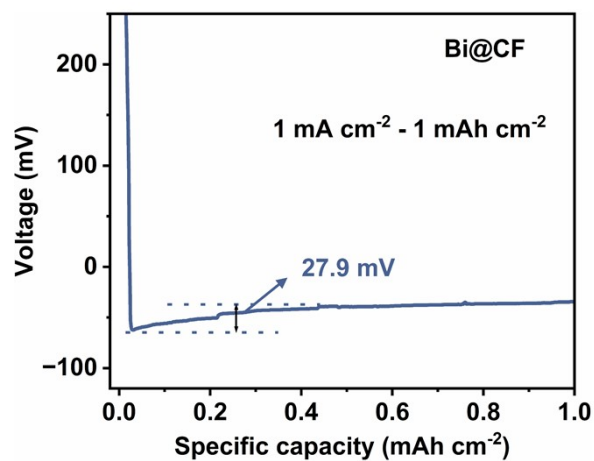

**Fig. S11.** Nucleation overpotentials of Bi@CF at  $1 \text{ mA cm}^{-2}$ .

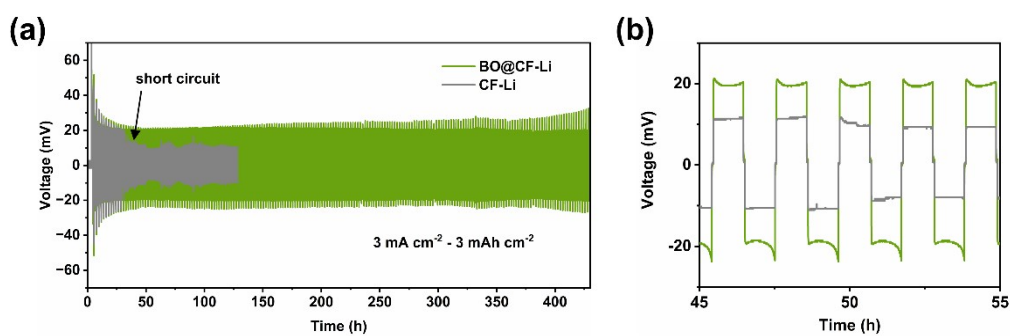

**Fig. S12.** Voltage curves of Li||Li symmetrical cells at a current density of  $3 \text{ mA cm}^{-2}$  with a cycling capacity of  $3 \text{ mAh cm}^{-2}$ . (b) Enlarged view of the short-circuit section.

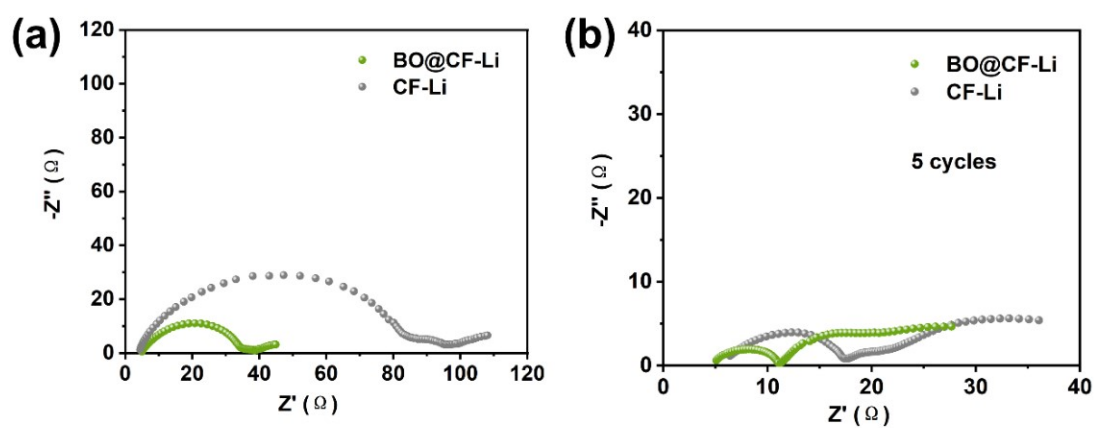

**Fig. S13.** EIS plot for BO@CF-Li and CF-Li symmetrical cells (a) before and (b) after cycling.

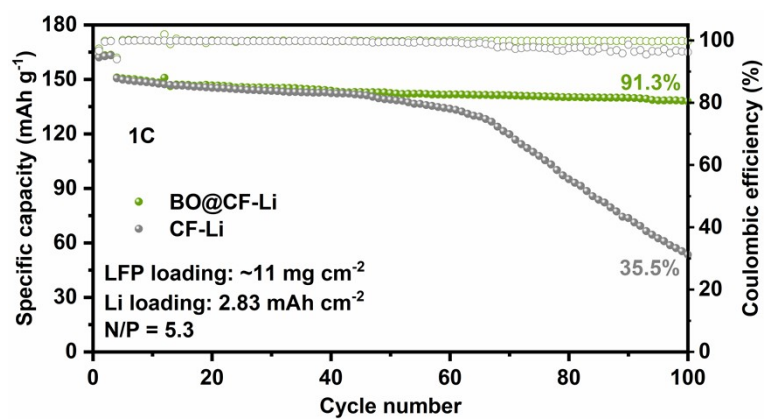

**Fig. S14.** Cycling performances of LFP||BO@CF-Li and LFP||CF-Li full cells at a rate of 1 C under the N/P ratio of 1.5.



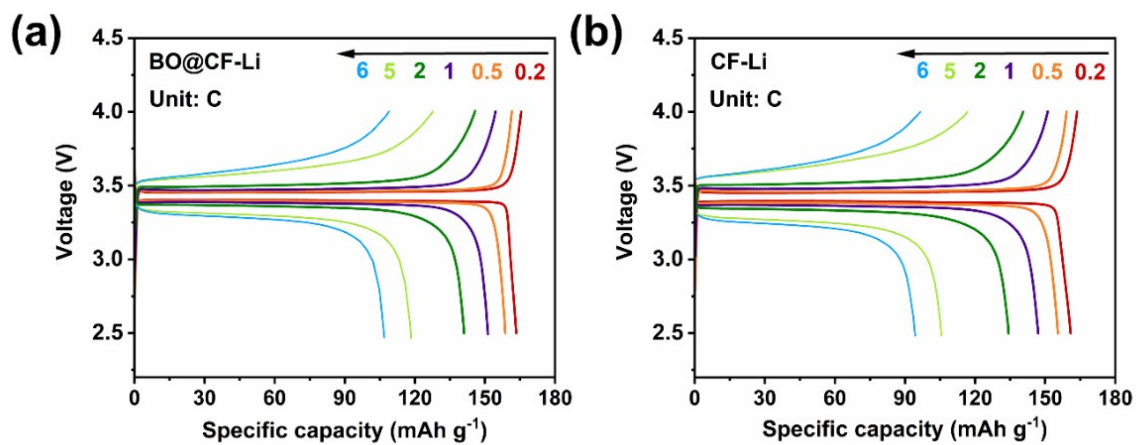

**Fig. S15.** The charge/discharge curves of the first cycle at different rates for full cells of (a) BO@CF-Li||LFP, (b) CF-Li||LFP.

**Table S1.** The comparison of cycling performance of half cells with BO@CF and other modified copper foams previously reported in literature. The electrolytes used are all 1 M LiTFSI in 1:1(v/v) DOL/DME with 1~4% LiNO<sub>3</sub>. (Note: Cycle life here is the number of cycles at which the coulombic efficiency begins to continuously decay. The cycle life of 180 cycles for Bi@CF in ref. [1] refers only to the maximum life data given in the paper.)

| Current collector       | Cycle number | Over potential (mV) | Ref.             |
|-------------------------|--------------|---------------------|------------------|
| Sb-NW@CF                | 140          | 32.6                | [14]             |
| Bi@CF                   | 180          | 32                  | [1]              |
| Sb@CF                   | 500          | 53.8                | [21]             |
| Ag@CF                   | 490          | 36.8                | [38]             |
| Sn-Cu <sub>2</sub> O@CF | 150          | 60.5                | [39]             |
| NiO@CF                  | 320          | 23                  | [40]             |
| CuFePBA@CF              | 300          | 26                  | [41]             |
| ZnO@CF                  | 300          | 35                  | [42]             |
| <b>BO@CF</b>            | <b>600</b>   | <b>13.9</b>         | <b>This work</b> |

**Table S2.** The initial coulombic efficiency (ICE) and the average coulombic efficiency (ACE) of BO@CF-Li||LFP, CF-Li||LFP and Cufoil-Li||LFP.

|                  | BO@CF-Li  LFP | CF-Li  LFP | Cufoil-Li  LFP |
|------------------|---------------|------------|----------------|
| ICE              | 94.51%        | 93.96%     | 96.10%         |
| ACE (100 cycles) | 99.84%        | 98.60%     | 99.11%         |
